# Supplementary figures and images for: High‐grade mesenchymal pancreatic ductal adenocarcinoma drives stromal deactivation through CSF‐1
Source: PubMed Central journal article supplement — EMBO Rep. 2020 Mar 16;21(5):e48780. doi: 10.15252/embr.201948780 (PMC7202203; doi:10.15252/embr.201948780), 2020-03-16

pSTAT3

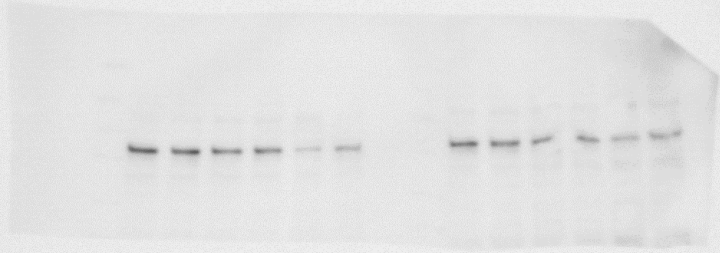

pSrc

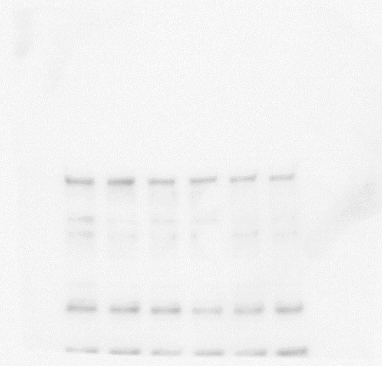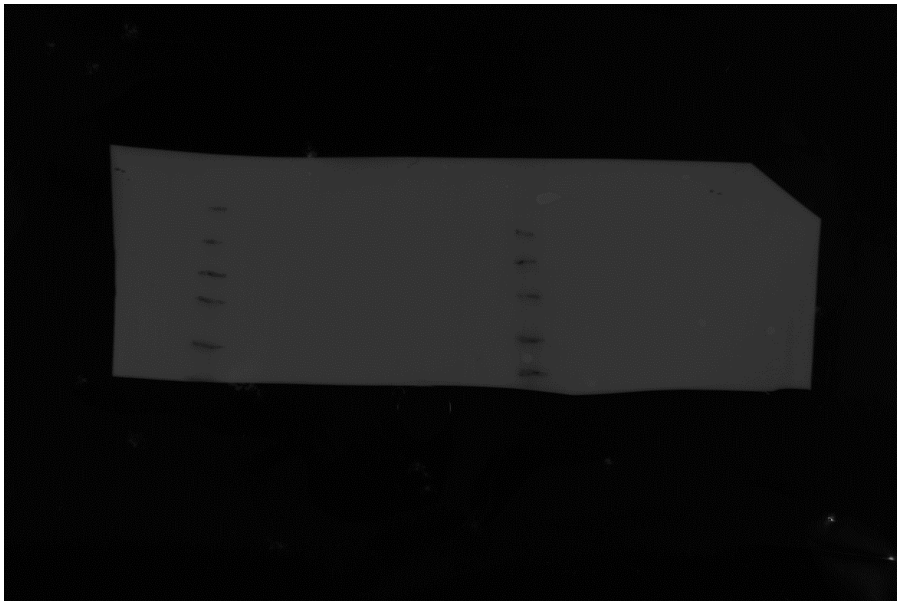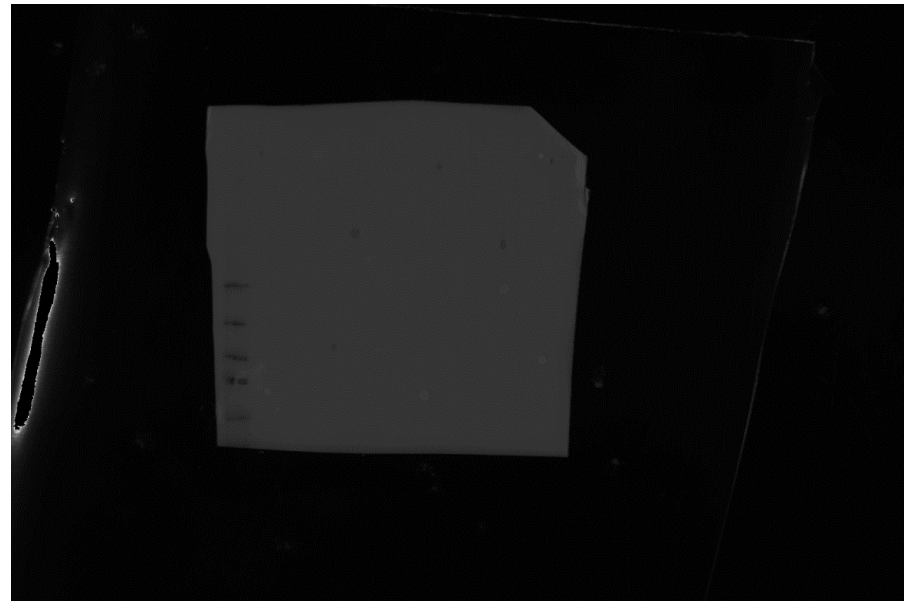

pMAPK1/ERK2

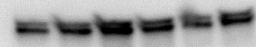

pS6K

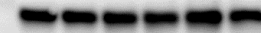

18

2A

pAKT

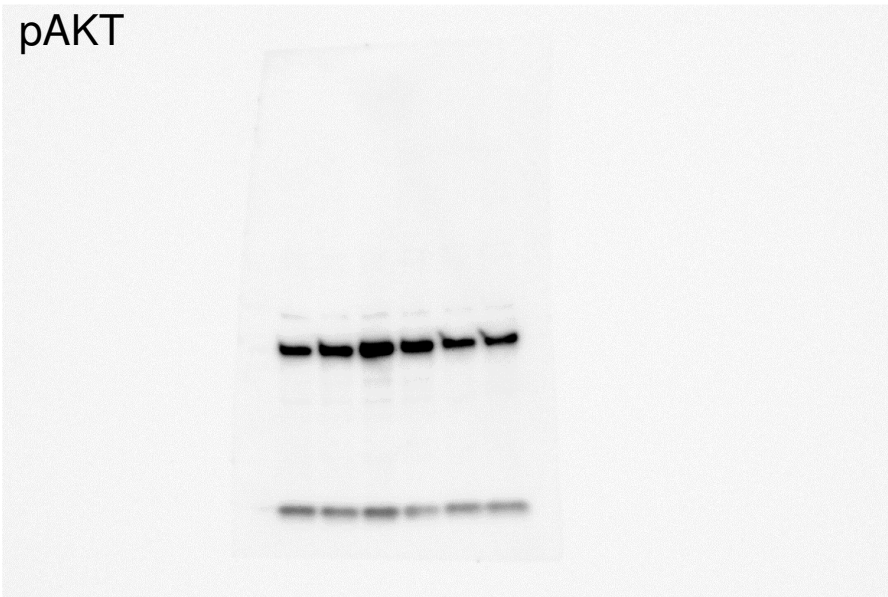

$\alpha$ -Tubulin

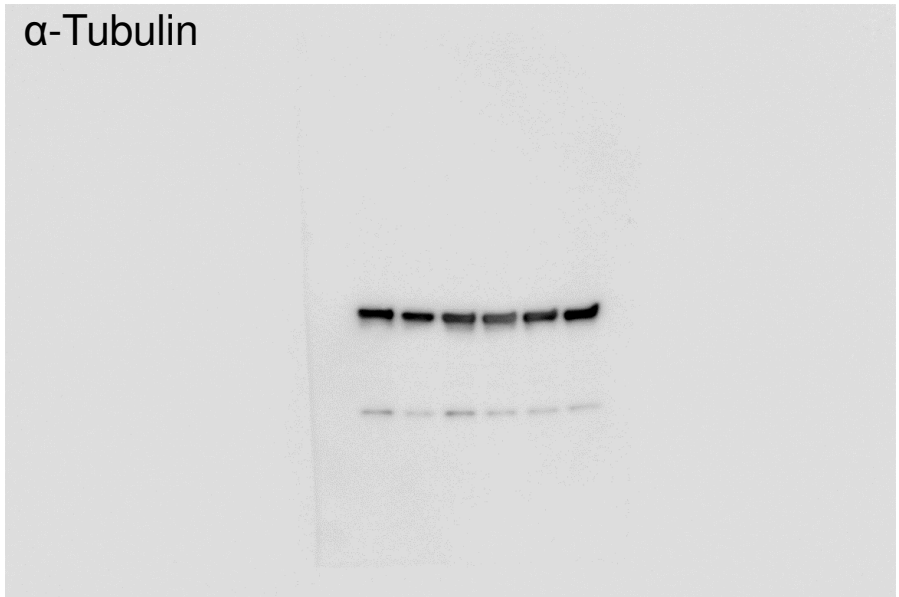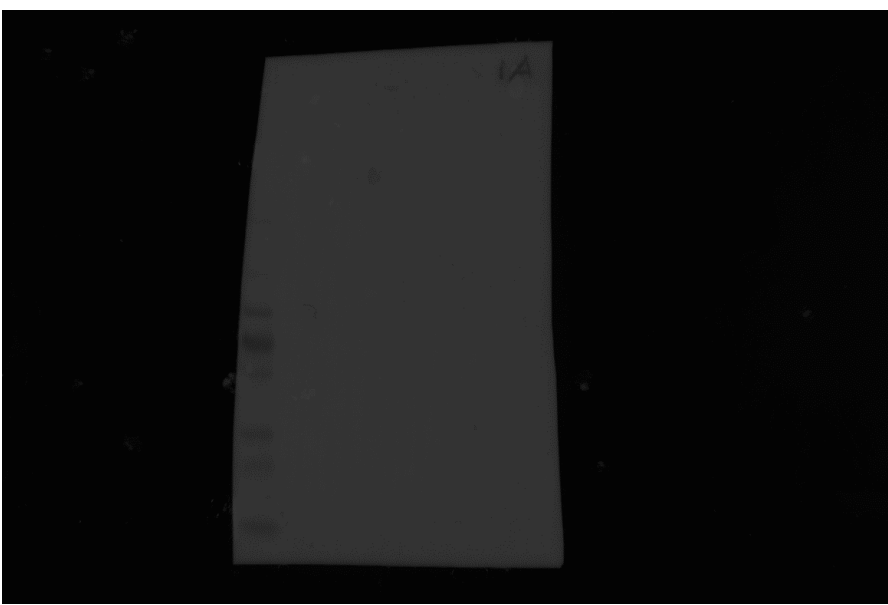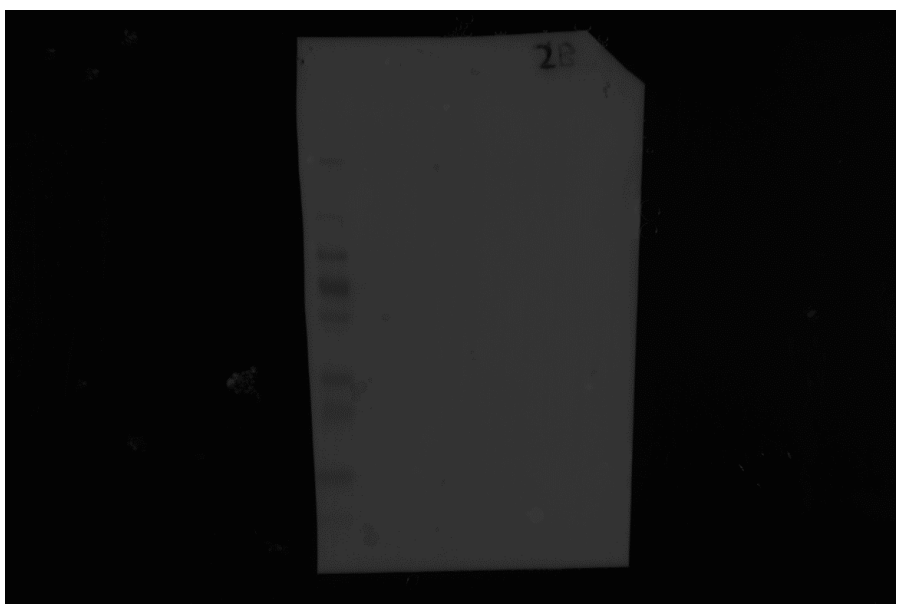

Supplement: EMBR-21-e48780-s003.pdf [file EMBR-21-e48780-s003.pdf]
